## RETRACTION

# Retraction: Detecting phishing websites using machine learning technique

The *PLOS One* Editors

The *PLOS One* Editors retract this article [1] because it was identified as one of a series of submissions for which we have concerns about peer review integrity and potential manipulation of the publication process. These concerns call into question the validity and provenance of the reported results. We regret that the issues were not identified prior to the article's publication.

The author either did not respond directly or could not be reached.

## Reference

1. Dutta AK. Detecting phishing websites using machine learning technique. *PLoS One*. 2021;16(10): e0258361. <https://doi.org/10.1371/journal.pone.0258361> PMID: [34634081](https://pubmed.ncbi.nlm.nih.gov/34634081/)

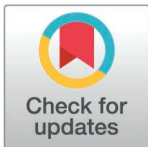

## OPEN ACCESS

**Citation:** The *PLOS One* Editors (2025) Retraction: Detecting phishing websites using machine learning technique. *PLoS ONE* 20(4): e0322065. <https://doi.org/10.1371/journal.pone.0322065>

**Published:** April 23, 2025

**Copyright:** © 2025 The *PLOS One* Editors. This is an open access article distributed under the terms of the [Creative Commons Attribution License](https://creativecommons.org/licenses/by/4.0/), which permits unrestricted use, distribution, and reproduction in any medium, provided the original author and source are credited.
